# Supplementary material for: Long-Term Aberrations To Cerebellar Endocannabinoids Induced By Early-Life Stress
Source: Sci Rep. 2020 Apr 29;10:7236. doi: 10.1038/s41598-020-64075-4 (PMC7190863; doi:10.1038/s41598-020-64075-4)
Supplement: Supplementary file 1 — Supplementary information. [file 41598_2020_64075_MOESM1_ESM.docx]

**SUPPLEMENTARY INFORMATION**

**for**

**LONG-TERM ABERRATIONS TO CEREBELLAR ENDOCANNABINOIDS INDUCED BY EARLY-LIFE STRESS**

**Authors**: Alexandra B. Moussa-Tooks, B.A.1,2, Eric R. Larson1, Alex F. Gimeno1, Emma Leishman, Ph.D.1,2, Lisa A. Bartolomeo, B.S.1, Heather B. Bradshaw, Ph.D.1,2, John T. Green, Ph.D.3, Brian F. O’Donnell, Ph.D.1,2,4, Ken Mackie, M.D.1,2,5, William P. Hetrick, Ph.D.1,2,4

1Psychological and Brain Sciences, Indiana University, Bloomington, IN

2Program in Neuroscience, Indiana University, Bloomington, IN

3Department of Psychological Science, University of Vermont, Burlington, VT

4Department of Psychiatry, Indiana University School of Medicine, Indianapolis, IN

5Linda and Jack Gill Center for Biomolecular Science, Indiana University, Bloomington, IN

**Running Title:** Early-life Stress and Cerebellar Endocannabinoids

**Corresponding Author:** William P. Hetrick

1101 E. 10th St.

Bloomington, IN

47405

Phone: (812) 855-2620

Fax: (812) 855-4691

Email: whetrick@indiana.edu

*Key Words: limited nesting, cerebellum, early-life stress, endocannabinoids, vulnerability, sex-differences*

| **Supplementary Table 1: Crus/HVI Endocannabinoids** | | | | | |
| --- | --- | --- | --- | --- | --- |
| **Lipid Species** | **Male** | | **Female** | |  |
| **Normal**  **Rearing**  (N=8) | **Limited**  **Bedding**  (N=8) | **Normal**  **Rearing**  (N=6) | **Limited**  **Bedding**  (N=7) | ***p*-value*** |
| ***N*-acyl ethanolamine** |  |  |  |  |  |
| *N*-palmitoyl ethanolamine | 4.9E-10±  6.25E-11 | 5.52E-10±  2.86E-11 | 3.77E-10±  5.46E-11 | 4.64E-10±  5.94E-11 | NS |
| *N*-stearoyl ethanolamine | *2.41E-10±*  *3.97E-11* | 2.34E-10±  2.83E-11 | *1.21E-10±*  *2.52E-11* | 2.11E-10±  4.03E-11 | *0.028* |
| *N*-oleoyl ethanolamine | *2.1E-09±*  *3.28E-10* | 1.96E-09±  3.31E-10 | *1.03E-09±*  *2.09E-10* | 1.66E-09±  3.17E-10 | *0.027* |
| *N*-linoleoyl ethanolamine | *2.01E-11±*  *1.93E-12* | 1.72E-11±  1.58E-12 | *9.66E-12±*  *1.24E-12* | 1.45E-11±  1.78E-12 | *<0.001* |
| *N*-arachidonoyl ethanolamine | 1.79E-11±  2.91E-12 | 1.25E-11±  5.37E-13 | 1.58E-11±  2.34E-12 | 1.62E-11±  2.59E-12 | NS |
| *N*-docosahexaenoyl ethanolamine | 3.16E-11±  2.66E-12 | 3.06E-11±  9.74E-13 | 3.01E-11±  4.28E-12 | 3.04E-11±  4.26E-12 | NS |
| ***N*-acyl glycine** |  |  |  |  |  |
| *N*-palmitoyl glycine | *4.85E-11±*  *3.99E-12* | **4.68E-11±**  **3.65E-12** | *6.46E-11±*  *7.94E-12* | **6.09E-11±**  **2.64E-12** | *0.021*  **0.045** |
| *N*-stearoyl glycine | 1..45E-11±  9.22E-13 | 1.4E-11±  9.11E-13 | 1.5E-11±  1.19E-12 | 1.64E-11±  1.42E-12 | NS |
| *N*-oleoyl glycine | 4.35E-12±  5.74E-13 | 3.6E-12±  2.47E-13 | 3.19E-12±  3.06E-13 | 4.26E-12±  4.51E-13 | NS |
| *N*-linoleoyl glycine | 6.95E-13±  8.63E-14 | 8E-13±  1.73E-13 | 8.49E-13±  2.43E-13 | 7.63E-13±  1.39E-13 | NS |
| *N*-arachidonoyl glycine | 7.09E-12±  2.22E-13 | 5.83E-12±  8.92E-14 | 6.48E-12±  8.35E-13 | 6.23E-12±  7.1E-13 | NS |
| *N*-docosahexaenoyl glycine | *1.5E-12±*  *1.22E-13* | 1.61E-12±  3.09E-13 | *2.08E-12±*  *8.27E-14*♀ | 1.46E-12±  1.16E-13♀ | *0.005*  0.004♀ |
| ***N*-acyl taurine** |  |  |  |  |  |
| *N*-palmitoyl taurine | 1.25E-10±  8.87E-12 | 1.16E-10±  8.16E-12 | 1.22E-10±  3.31E-12 | 1.26E-10±  6.23E-12 | NS |
| *N*-stearoyl taurine | 1.08E-10±  7.84E-12 | 1.26E-10±  9.89E-12 | 1.34E-10±  1.32E-11 | 1.16E-10±  6.49E-12 | NS |
| *N*-oleoyl taurine | 2.55E-11±  2.25E-12 | 2.04E-11±  2.33E-12 | 2.2E-11±  3.83E-12 | 2.17E-11±  2.48E-12 | NS |
| *N*-arachidonoyl taurine | 2.05E-10±  1.65E-11 | 2.22E-10±  1.6E-11 | 2.06E-10±  1.61E-11 | 2.05E-10±  1.15E-11 | NS |
| **2-acyl glycerol** |  |  |  |  |  |
| 2-palmitoyl glycerol | 3.37E-09±  5.2E-10 | 4.41E-09±  1.04E-09 | 4.69E-09±  1.28E-09 | 2.91E-09±  4.66E-10 | NS |
| 2-oleoyl glycerol | 6.36E-09±  6.41E-10 | 6.29E-09±  5.2E-10 | 5.89E-09±  6.02E-10 | 4.88E-09±  5.23E-10 | NS |
| 2-linoleoyl glycerol | 6.48E-10±  3.42E-11 | **7.01E-10±**  **6.9E-11** | 6.31E-10±  8.07E-11 | **4.96E-10±**  **5.14E-11** | **0.020** |
| 2-arachidonoyl glycerol | *1.22E-09±*  *3.6E-11* | 1.29E-09±  6.91E-11 | *1.26E-09±*  *5.1E-11♀* | 1.09E-09±  1.18E-10♀ | *0.020*  0.002♀ |
| **Free Fatty Acids** |  |  |  |  |  |
| Oleic acid | 3.84E-10±  4.09E-11 | 4.13E-10±  3.95E-11 | 3.23E-10±  3.32E-11 | 3.33E-10±  4.55E-11 | NS |
| Linoleic acid | 6.07E-10±  4.26E-11 | **6.25E-10±**  **2.93E-11** | 5.11E-10±  6.17E-11 | **4.87E-10±**  **5.66E-11** | **0.047** |
| Arachidonic acid | 7.23E-09±  4.26E-10 | 8E-09±  4.43E-10 | 7.65E-09±  5.65E-10 | 7.48E-09±  6.51E-10 | NS |
| **Prostaglandins** |  |  |  |  |  |
| PGE2 | 9.54E-11±  7.62E-12 | 8.29E-11±  9.18E-12 | 8.18E-11±  6.88E-12 | 6.82E-11±  6.51E-12 | NS |
| PGF2α | *1.66E-10±*  *1.34E-11* | 2.04E-10±  7.92E-12 | *2.25E-10±*  *1.81E-11* | 1.96E-10±  2.33E-11 | *0.017* |
| 6-ketoPGF1α | BAL | BAL | BAL | BAL | -- |
| **Sample Mass** |  |  |  |  |  |
| Sample Mass | *0.02±1.12E-3* | 0.02±7.3E-4 | *0.02±2.1E-3* | 0.02±8.1E-4 | *0.001* |
| Data are moles per gram tissue and are shown as means ± SE. Values in light face have no significant difference among the groups. *Least Significant Difference corrected *p*≤0.05. *Italicized* values denote a significant sex effect for normally reared animals, whereas those in **bold** denote a significant sex effect for limited bedding animals; ♀=significant treatment effect for females, NS=Not Significant*.* BAL=Below Analytical Limits. | | | | | |

| **Supplementary Table 2: Interpositus Nucleus Endocannabinoids** | | | | | |
| --- | --- | --- | --- | --- | --- |
| **Lipid Species** | **Male** | | **Female** | |  |
| **Normal**  **Rearing**  (N=8) | **Limited**  **Bedding**  (N=8) | **Normal**  **Rearing**  (N=6) | **Limited**  **Bedding**  (N=7) | ***p*-value*** |
| ***N*-acyl ethanolamine** |  |  |  |  |  |
| *N*-palmitoyl ethanolamine | 2.81E-10±  3.18E-11 | 3.29E-10±  3.87E-11 | 3.13E-10±  4.37E-11 | 3.46E-10±  3.11E-11 | NS |
| *N*-stearoyl ethanolamine | 7.45E-11±  1.14E-11 | 7.31E-11±  7.65E-12 | 7.17E-11±  5.79E-12 | 9.10E-11±  1.31E-11 | NS |
| *N*-oleoyl ethanolamine | 2.25E-10±  2.86E-11 | 2.24E-10±  2.03E-11 | 2.10E-10±  2.37E-11 | 2.35E-10±  2.84E-11 | NS |
| *N*-linoleoyl ethanolamine | *2.93E-11±*  *2.86E-12* | 2.75E-11±  1.85E-12 | *2.03E-11±*  *2.02E-12* | 2.10E-11±  2.71E-12 | *0.020* |
| *N*-arachidonoyl ethanolamine | 1.47E-11±  1.60E-12 | 1.11E-11±  3.84E-13 | 1.10E-11±  1.00E-12 | 1.16E-11±  2.15E-12 | NS |
| *N*-docosahexaenoyl ethanolamine | 2.57E-11±  2.87E-12 | 2.29E-11±  1.79E-12 | 2.08E-11±  2.25E-12 | 2.25E-11±  2.36E-12 | NS |
| ***N*-acyl glycine** |  |  |  |  |  |
| *N*-palmitoyl glycine | 1.39E-11±  1.14E-12 | 1.29E-11±  1.53E-12 | 1.50E-11±  2.88E-12 | 1.81E-11±  1.98E-12 | NS |
| *N*-stearoyl glycine | 2.42E-12±  1.82E-13 | 2.41E-12±  4.29E-13 | 2.39E-12±  6.30E-13 | 3.24E-12±  4.56E-13 | NS |
| *N*-oleoyl glycine | 2.94E-12±  2.31E-13 | **2.47E-12±**  **1.74E-13** | 3.56E-12±  5.58E-13 | **3.65E-12±**  **5.59E-13** | **0.038** |
| *N*-linoleoyl glycine | 9.89E-13±  1.35E-13 | 8.34E-13±  1.65E-13 | 1.26E-12±  3.23E-13 | 1.01E-12±  1.12E-13 | NS |
| *N*-arachidonoyl glycine | 6.71E-12±  9.91E-13 | 5.69E-12±  4.78E-13 | 5.37E-12±  8.62E-13 | 6.62E-12±  1.47E-12 | NS |
| *N*-docosahexaenoyl glycine | 2.55E-12±  2.40E-13 | 2.01E-12±  1.92E-13 | 2.78E-12±  2.76E-13 | 3.47E-12±  5.52E-13 | NS |
| ***N*-acyl taurine** |  |  |  |  |  |
| *N*-palmitoyl taurine | 1.57E-10±  9.45E-12 | 1.51E-10±  7.65E-12 | 1.57E-10±  1.56E-11 | 1.44E-10±  7.70E-12 | NS |
| *N*-stearoyl taurine | 1.72E-10±  4.10E-12 | 1.82E-10±  1.39E-11 | 1.78E-10±  1.24E-11 | 1.89E-10±  1.26E-11 | NS |
| *N*-oleoyl taurine | 2.79E-11±  2.86E-12 | 3.49E-11±  5.21E-12 | 3.04E-11±  3.22E-12 | 3.59E-11±  4.54E-12 | NS |
| *N*-arachidonoyl taurine | *2.53E-11±*  *7.46E-12* | **2.53E-11±**  **7.42E-12** | *1.68E-11±*  *3.42E-12* | **1.59E-11±**  **5.18E-12** | *0.017*  **0.009** |
| **2-acyl glycerol** |  |  |  |  |  |
| 2-palmitoyl glycerol | 2.85E-08±  8.60E-09 | 2.92E-08±  1.11E-08 | 2.56E-08±  1.21E-08 | 4.05E-08±  1.67E-08 | NS |
| 2-oleoyl glycerol | 9.81E-09±  1.44E-09 | 7.79E-09±  9.90E-10 | 8.85E-09±  1.24E-09 | 9.65E-09±  1.62E-09 | NS |
| 2-linoleoyl glycerol | 9.45E-10±  1.14E-10 | 7.13E-10±  5.86E-11 | 7.95E-10±  7.76E-11 | 9.00E-10±  7.54E-11 | NS |
| 2-arachidonoyl glycerol | 1.49E-09±  1.65E-10♂ | **1.07E-09±**  **7.53E-11**♂ | 1.54E-09±  9.19E-11 | **1.80E-09±**  **8.97E-11** | 0.015♂  **<0.001** |
| **Free Fatty Acids** |  |  |  |  |  |
| Oleic acid | 2.69E-10±  2.41E-11 | 2.56E-10±  2.69E-11 | 2.24E-10±  1.51E-11 | 2.62E-10±  3.89E-11 | NS |
| Linoleic acid | *6.04E-13±*  *7.17E-14* | 4.44E-13±  6.41E-14 | *3.35E-13±*  *6.12E-14* | 2.70E-13±  4.90E-14 | *0.008* |
| Arachidonic acid | *4.35E-10±*  *2.05E-11*♂ | 3.58E-10±  2.28E-11♂ | *3.72E-10±*  *1.12E-11* | 3.34E-10±  2.38E-11 | *0.049*  0.011♂ |
| **Prostaglandins** |  |  |  |  |  |
| PGE2 | *8.93E-11±*  *6.77E-12* | **7.57E-11±**  **4.02E-12** | *6.56E-11±*  *7.07E-12*♀ | **9.93E-11±**  **9.35E-12**♀ | *0.026*  **0.024**  0.004♀ |
| PGF2α | BAL | BAL | BAL | BAL |  |
| 6-ketoPGF1α | 3.18E-11±  4.66E-12 | 3.72E-11±  4.04E-12 | 4.07E-11±  6.82E-12 | 4.79E-11±  7.83E-12 | NS |
| **Sample Mass** |  |  |  |  |  |
| Sample Mass | *0.02±5.03E-4* | **0.02±6.34E-4** | *0.02±9.30E-4* | **0.02±1.02E-3** | *0.020*  **0.001** |
| Data are moles per gram tissue and are shown as means ± SE. Values in light face have no significant difference among the groups. *Least Significant Difference corrected *p*≤0.05. *Italicized* values denote a significant sex effect for normally reared animals, whereas those in **bold** denote a significant sex effect for limited bedding animals; ♂️=significant treatment effect for males, ♀=significant treatment effect for females, NS=Not Significant*.* BAL=Below Analytical Limits. | | | | | |

| **Supplementary Table 3: Dorsal Hippocampus Endocannabinoids** | | | | | |
| --- | --- | --- | --- | --- | --- |
| **Lipid Species** | **Male** | | **Female** | |  |
| **Normal**  **Rearing**  (N=8) | **Limited**  **Bedding**  (N=8) | **Normal**  **Rearing**  (N=6) | **Limited**  **Bedding**  (N=7) | ***p*-value*** |
| ***N*-acyl ethanolamine** |  |  |  |  |  |
| *N*-palmitoyl ethanolamine | 5.62E-10±  7.69E-11 | 6.47E-10±  1.16E-10 | 3.55E-10±  4.5E-11 | 4.12E-10±  8.05E-11 | NS |
| *N*-stearoyl ethanolamine | 5.2E-11±  1.07E-11 | 7.91E-11±  9.59E-12 | 4.53E-11±  8.46E-12 | 5.16E-11±  1.16E-11 | NS |
| *N*-oleoyl ethanolamine | 6.36E-10±  4.76E-11 | 7.61E-10±  7.31E-11 | 4.73E-10±  3.82E-11 | 6.39E-10±  1.3E-10 | NS |
| *N*-linoleoyl ethanolamine | 1.07E-10±  1.29E-11 | 1.04E-10±  1.28E-11 | 8.61E-11±  1.26E-11 | 9.44E-11±  1.28E-11 | NS |
| *N*-arachidonoyl ethanolamine | 4.66E-11±  7.07E-12 | 4.21E-11±  5.11E-12 | 4.15E-11±  8.57E-12 | 4.81E-11±  7.18E-12 | NS |
| *N*-docosahexaenoyl ethanolamine | 3.83E-11±  4.87E-12 | 4.01E-11±  5.47E-12 | 3.1E-11±  5.29E-12 | 4.47E-11±  8.96E-12 | NS |
| ***N*-acyl glycine** |  |  |  |  |  |
| *N*-palmitoyl glycine | 1.15E-11±  6.07E-13 | 1.5E-11±  9.45E-13 | 1.4E-11±  2.27E-12 | 1.29E-11±  1.57E-12 | NS |
| *N*-stearoyl glycine | 6.75E-12±  4.34E-13 | 6.63E-12±  4.92E-13 | 6.85E-12±  5E-13 | 6.97E-12±  3.85E-13 | NS |
| *N*-oleoyl glycine | 5.28E-12±  3.47E-13 | 6.2E-12±  2.66E-13 | 5.57E-12±  3.36E-13 | 6.25E-12±  3.89E-13 | NS |
| *N*-linoleoyl glycine | 4.72E-13±  4.11E-14 | 5.97E-13±  5.08E-14 | 6.15E-13±  8.04E-14 | 5.81E-13±  9.82E-14 | NS |
| *N*-arachidonoyl glycine | 1.15E-11±  1E-12 | 1.15E-11±  8.6E-13 | 1.23E-11±  9.05E-13 | 1.35E-11±  1.65E-12 | NS |
| *N*-docosahexaenoyl glycine | 8.7E-13±  1.15E-13 | 1.02E-12±  1.27E-13 | 8.61E-13±  1.26E-13 | 1.28E-12±  3.05E-13 | NS |
| ***N*-acyl taurine** |  |  |  |  |  |
| *N*-palmitoyl taurine | 1.58E-10±  1.54E-11 | 1.55E-10±  2.04E-11 | 1.37E-10±  9.47E-12 | 1.46E-10±  1.85E-11 | NS |
| *N*-stearoyl taurine | 6.34E-11±  7.14E-12 | 7.23E-11±  6.43E-12 | 7E-11±  8.21E-12 | 7.16E-11±  8.72E-12 | NS |
| *N*-oleoyl taurine | 1.73E-11±  1.97E-12 | 1.85E-11±  2.48E-12 | 1.78E-11±  1.9E-12 | 1.63E-11±  2.27E-12 | NS |
| *N*-arachidonoyl taurine | 3.8E-11±  4.7E-12 | 3.75E-11±  5.66E-12 | 4.43E-11±  3.95E-12 | 3.83E-11±  4.49E-12 | NS |
| **2-acyl glycerol** |  |  |  |  |  |
| 2-palmitoyl glycerol | 6.56E-09±  1.06E-09 | 7.76E-09±  1.15E-09 | 4.65E-09±  7.35E-10 | 5.54E-09±  8.32E-10 | NS |
| 2-oleoyl glycerol | *1.4E-08±*  *2.24E-09* | 1.26E-08±  2.26E-09 | *7.33E-09±*  *1.26E-09* | 8.59E-09±  1.55E-09 | *0.029* |
| 2-linoleoyl glycerol | *9.55E-11±*  *6.97E-12* | **9.31E-11±**  **8.44E-12** | *5.05E-11±*  *4.97E-12* | **4.95E-11±**  **4.94E-12** | *<0.001*  **<0.001** |
| 2-arachidonoyl glycerol | *5.52E-10±*  *7.7E-11* | 4.39E-10±  7.76E-11 | *3.19E-10±*  *6.8E-11* | 3.3E-10±  5.33E-11 | *0.034* |
| **Free Fatty Acids** |  |  |  |  |  |
| Oleic acid | 4.8E-09±  4.75E-10 | 5.52E-09±  5.33E-10 | 4.5E-09±  7.6E-10 | 5.13E-09±  5.51E-10 | NS |
| Linoleic acid | 5.04E-10±  2.96E-11 | 5.63E-10±  4.11E-11 | 4.22E-10±  3.64E-11 | 4.91E-10±  3.59E-11 | NS |
| Arachidonic acid | 3.13E-09±  1.12E-10 | 3.46E-09±  1.87E-10 | 3.49E-09±  3.05E-10 | 3.5E-09±  1.88E-10 | NS |
| **Prostaglandins** |  |  |  |  |  |
| PGE2 | 1.98E-11±  1.54E-12♂ | 2.88E-11±  1.82E-12♂ | 2.47E-11±  1.6E-12 | 2.53E-11±  2.34E-12 | 0.001♂ |
| PGF2α | *2.71E-11±*  *1.16E-12*♂ | 3.75E-11±  9.46E-13♂ | *3.21E-11±*  *2.53E-12* | 3.33E-11±  1.41E-12 | <0.001♂  *0.027* |
| 6-ketoPGF1α | BAL | BAL | BAL | BAL | -- |
| **Sample Mass** |  |  |  |  |  |
| Sample Mass | 0.02±7.32E-4 | 0.02±1.24E-3 | 0.02±6.29E-4 | 0.02±6.72E-4 | NS |
| Data are moles per gram tissue and are shown as means ± SE. Values in light face have no significant difference among the groups. *Least Significant Difference corrected *p*≤0.05. *Italicized* values denote a significant sex effect for normally reared animals, whereas those in **bold** denote a significant sex effect for limited bedding animals; ♂=significant treatment effect for males, NS=Not Significant*.* BAL=Below Analytical Limits. | | | | | |
